# Supplementary material for: Metabolically Defined Body Size Phenotypes and Risk of Endometrial Cancer in the European Prospective Investigation into Cancer and Nutrition (EPIC)
Source: Oxford University Press journal article supplement (doi:10.1158/1055-9965.epi-22-0160), 2022-04-18
Supplement: epi-22-0160-sst2.docx [file epi-22-0160-sst2.docx]

**Table S2. Cut-off points for metabolic health based on tertiles, quartiles and median of C-peptide concentration amongst controls**

| **Classification** | **Sample** | **C-peptide level (maximum value)** | |
| --- | --- | --- | --- |
| Standardised value | Actual concentrations (ng/ml) |
| 1st Tertile | Phase 1 | -0.63 | 1.76 |
|  | Phase 2 | -0.63 | 1.07 |
| 1st Quartile | Phase 1 | -0.74 | 1.61 |
|  | Phase 2 | -0.74 | 0.94 |
| Median | Phase 1 | -0.37 | 2.21 |
|  | Phase 2 | -0.37 | 1.36 |

**Note.** Metabolically healthy was defined as those below 1st tertile or 1st quartile or median of C-peptide. Metabolically unhealthy was defined as those above 1st tertile or 1st quartile or median of C-peptide.
