# Supplementary material for: Metabolically Defined Body Size Phenotypes and Risk of Endometrial Cancer in the European Prospective Investigation into Cancer and Nutrition (EPIC)
Source: Oxford University Press journal article supplement (doi:10.1158/1055-9965.epi-22-0160), 2022-04-18
Supplement: epi-22-0160_supplementary_table_1_suppst1.docx [file epi-22-0160_supplementary_table_1_suppst1.docx]

**Table S1. Concentrations of C-peptide for cases and controls by method of analysis**

| **Phase (method of analysis)** | **Status** | **N** | **C-peptide (ng/ml)** | | | | | | | | |
| --- | --- | --- | --- | --- | --- | --- | --- | --- | --- | --- | --- |
| **Mean** | **Std** | **Minimum** | **10th Pctl** | **25th Pctl** | **Median** | **75th Pctl** | **90th Pctl** | **Maximum** |
| **Phase 1 (Immunotech)** | **Control** | **187** | 2.63 | 1.51 | 0.63 | 1.27 | 1.61 | 2.21 | 3.32 | 4.48 | 12.07 |
| **Case** | **191** | 3.06 | 1.83 | 0.48 | 1.33 | 1.76 | 2.53 | 3.76 | 5.88 | 11.82 |
| **Phase 2 (Mercodia)** | **Control** | **630** | 1.67 | 1.02 | 0.3 | 0.75 | 0.94 | 1.36 | 2.06 | 3.05 | 7.6 |
| **Case** | **626** | 1.86 | 1.14 | 0.37 | 0.79 | 1.08 | 1.49 | 2.37 | 3.43 | 7.37 |
