# Supplementary material for: Metabolically Defined Body Size Phenotypes and Risk of Endometrial Cancer in the European Prospective Investigation into Cancer and Nutrition (EPIC)
Source: Oxford University Press journal article supplement (doi:10.1158/1055-9965.epi-22-0160), 2022-04-18
Supplement: epi-22-0160_supplementary_table_4_suppst4.docx [file epi-22-0160_supplementary_table_4_suppst4.docx]

**Table S4. Partial Pearson correlations in control group adjusted for batch and age at blood collection, between levels of C-peptide and anthropometric variables**

| **Anthropometric measures** | **C-peptide level (ng/ml)** | | | | | | | |
| --- | --- | --- | --- | --- | --- | --- | --- | --- |
| **Phase 1** | |  | **Phase 2** | |  | **All controls** | |
| r | p |  | r | P |  | r | P |
| **Body Mass Index (kg/m2)** | 0.23 | 0.002 |  | 0.33 | <0.0001 |  | 0.31 | <0.0001 |
| **Waist Circumference (cm)** | 0.33 | <0.0001 |  | 0.38 | <0.0001 |  | 0.36 | <0.0001 |
| **Waist-to-Hip Ratio** | 0.29 | <0.0001 |  | 0.23 | <0.0001 |  | 0.24 | <0.0001 |
| **Hip Circumference (cm)** | 0.16 | 0.03 |  | 0.33 | <0.0001 |  | 0.29 | <0.0001 |
| **Weight (kg)** | 0.26 | 0.001 |  | 0.35 | <0.0001 |  | 0.33 | <0.0001 |
| **Height (cm)** | 0.04 | 0.602 |  | 0.05 | 0.198 |  | 0.05 | 0.144 |
